# Supplementary material for: Low percolation threshold of graphene/polymer composites prepared by solvothermal reduction of graphene oxide in the polymer solution
Source: Springer Nature journal article supplement (doi:10.1186/1556-276x-8-132), 2013-03-22

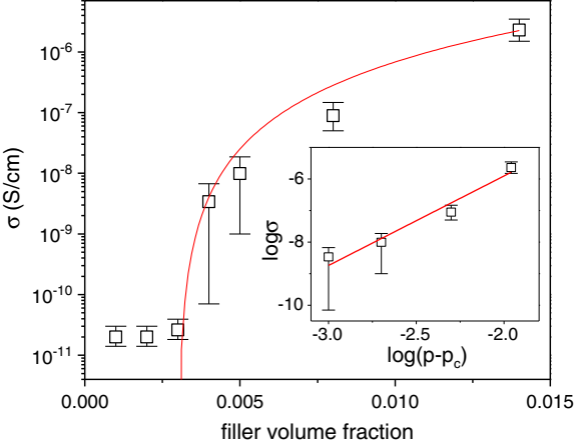

Supplement: 11671_2013_1405_MOESM3_ESM.pdf [file 11671_2013_1405_MOESM3_ESM.pdf]
